# Supplementary material
Source: PubMed Central journal article supplement (PMC7480712)
Supplement: Supp_FigS1.pdf [file Supp_FigS1.pdf]

## Supplementary Data

Date:

Subject Identifier:

Have you ever used medical or street marijuana in your lifetime?

Yes, medical marijuana      Yes, street marijuana      No

If you answered yes,

Why do you use marijuana? Check yes as many times you like.

To get high:     Yes      No

To relive pain:     Yes      No

To relive anxiety:     Yes      No

To improve mood:     Yes      No

To improve sleep:     Yes      No

To improve appetite:     Yes      No

How often to you use marijuana? Check one answer that is the closest.

less than once a month

every month

every week

every day

**SUPPLEMENTARY FIG. S1.** Survey developed by the researchers to examine cannabis use in the past 30 days and reasons for cannabis use.
