# Supplementary material
Source: PubMed Central journal article supplement (PMC7480712)
Supplement: Supp_FigS2.pdf [file Supp_FigS2.pdf]

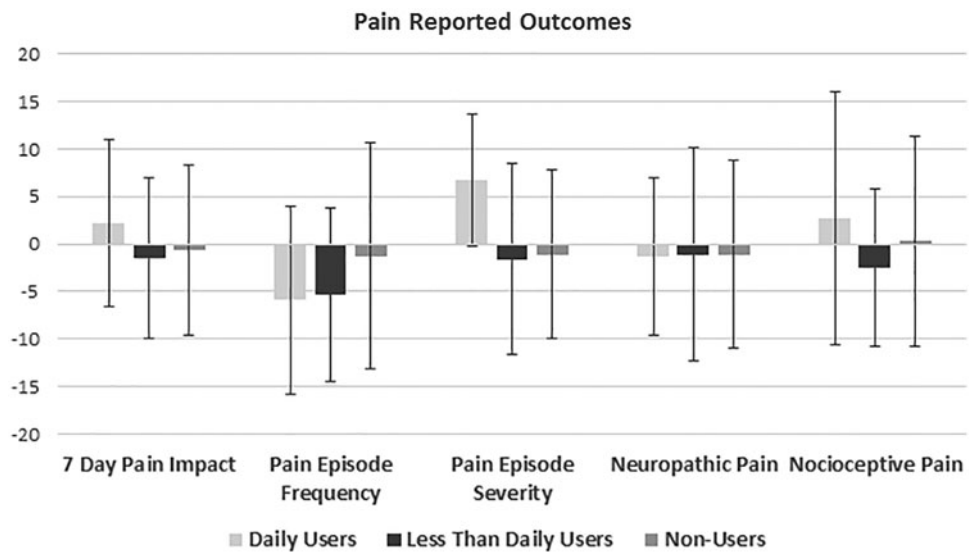

**SUPPLEMENTARY FIG. S2.** Patient-reported pain outcomes in daily cannabis users compared with less than daily users compared with nonusers. All domains have a reference population with a median score of 50 and an SD of 10. For the chart <50 is represented as a 0, 10 represents 1 SD more severe than the reference population, and -10 represents 1 SD less severe than the reference population. SD, standard deviation.
